# Supplementary material for: Structural phase transition, depolarization and enhanced pyroelectric properties of (Pb1−1.5xLax)(Zr0.66Sn0.23Ti0.11)O3 solid solution
Source: Royal Society of Chemistry journal article supplement (doi:10.1039/c6tc01326k), 2016-01-01
Supplement: c6tc01326k1.pdf [file c6tc01326k1.pdf]

## Electronic supplementary information (ESI)

### Structural phase transition, depolarization and enhanced pyroelectric properties of $(\text{Pb}_{1-1.5x}\text{La}_x)(\text{Zr}_{0.66}\text{Sn}_{0.23}\text{Ti}_{0.11})\text{O}_3$ solid solution

Fangping Zhuo<sup>a</sup>, Qiang Li<sup>\*a</sup>, Jinghan Gao<sup>a</sup>, Yujie Wang<sup>a</sup>, Qingfeng Yan<sup>a</sup>, Zhiguo Xia<sup>b</sup>, Yiling Zhang<sup>c</sup> and Xiangcheng Chu<sup>c</sup>

<sup>a</sup>*Department of Chemistry, Tsinghua University, Beijing 100084, China. E-mail: qiangli@mail.tsinghua.edu.cn. Fax: +86-10-62771179; Tel: +86-10-62797871*

<sup>b</sup>*School of Materials Sciences and Engineering, University of Science and Technology Beijing, Beijing 100083, China*

<sup>c</sup>*State Key Laboratory of New Ceramics and Fine Processing, Tsinghua University, Beijing 100084, China*

The SEM images of the fracture surfaces of selected PLZST ceramics are presented in Fig. S1. The well-grown grains and well-defined grain boundaries are observed for all the selected ceramics with non-uniform grain size distribution. It can be clearly seen that the grain size is strongly influenced by the amount of  $\text{La}^{3+}$  content. The L0 sample has an average grain size of about 7  $\mu\text{m}$ . As the content of  $\text{La}^{3+}$  increases, the grain size decreases to 5, 3 and 2  $\mu\text{m}$  for L1, L2 and L2.4 samples, respectively. This reduction in grain size reveals that the aliovalent additives of  $\text{La}^{3+}$  ions can restrain grain growth in the PLZST ceramics.

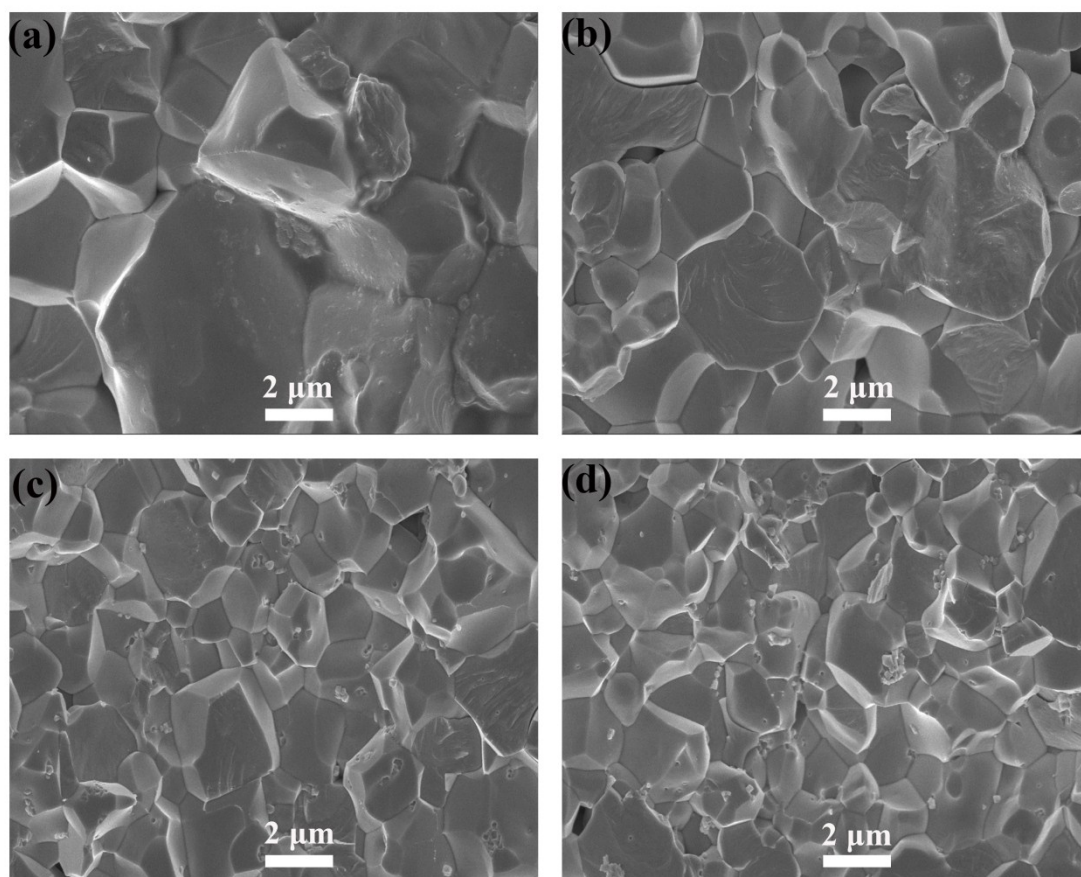

**Fig. S1.** SEM photographs of the fracture surfaces for part of the as-prepared ceramics. (a)  $x = 0$ , (b)  $x = 0.01$ , (c)  $x = 0.02$ , (d)  $x = 0.024$ .
